# Supplementary material for: Morphology-Based Spell Checker for Dawurootsuwa Language
Source: Hindawi journal article supplement (doi:10.1155/2023/7625785), 2023-05-10
Supplement: f1 [file 7625785.f1.docx]

| words | Manual Annotation by expert | |
| --- | --- | --- |
| aaraappe | correct | |
| bak'k'anchuwa | correct | |
| bak'k'ee | correct | |
| astamaariya | correct | |
| kushiya-bombiy | correct | |
| ka'to | | incorrect |
| wotsanawanata | | incorrect |
| bak'k'e | | incorrect |
| uluwa | | incorrect |

**Supplementary Material 1**

**Supplementary Material 2.**

| Sample True Negative words from first Experiment | | |
| --- | --- | --- |
| amaaraatswa | c'aadate | p'iniye |
| wotsanawanata | gtsaa | Pilla |
| shoc'ade’ikk | happ'ee | poo'e |
| Uluwa | harbabaa | sake |
| daabidabee | zebaa | sommia |
| ushaw | yarad'dee | shokookaa |
| daasiyape | Zuppiyani | taappe |

**Supplementary Material 3.**

| No | Erroneous Words | Expert Correction | System suggestions | Score |
| --- | --- | --- | --- | --- |
| 1 | zuppiyani | zuppiyan | zuppiyan zuppiyasi zuppiya | **1** |
| 2 | k'ans | k'ans' | k'ans' ank'a | **1** |
| 3 | ka’atidiawa | ka’etidiawa | not provided | 0 |
| 4 | kanayi | kanaay | kaniya | **-0.5** |
| 5 | k'anee | k'an’ee | k'angee k'unee k' anee k'-anee k'an'ee k'ans'ee eek'aaee eek'a | **0.5** |

**Supplementary Material 4.**

| **Sample Dawurootsuwa Affix Lexicons** | | | | |
| --- | --- | --- | --- | --- |
| **c'ee** | **ddaa** | **Ee** | **ppe** | **ippe** |
| **c'aa** | wuwa | A | kko | wa |
| **isi** | in | eella | ettee | o |
| **etusa** | an | in | see | bba |
| **iya** | uwa | wa | tsa | tetsaa |
